# Supplementary material
Source: PubMed Central journal article supplement (PMC6952535)
Supplement: NIHMS1545165-supplement-Supplemental_Information.pdf [file NIHMS1545165-supplement-Supplemental_Information.pdf]

## Supplemental Information

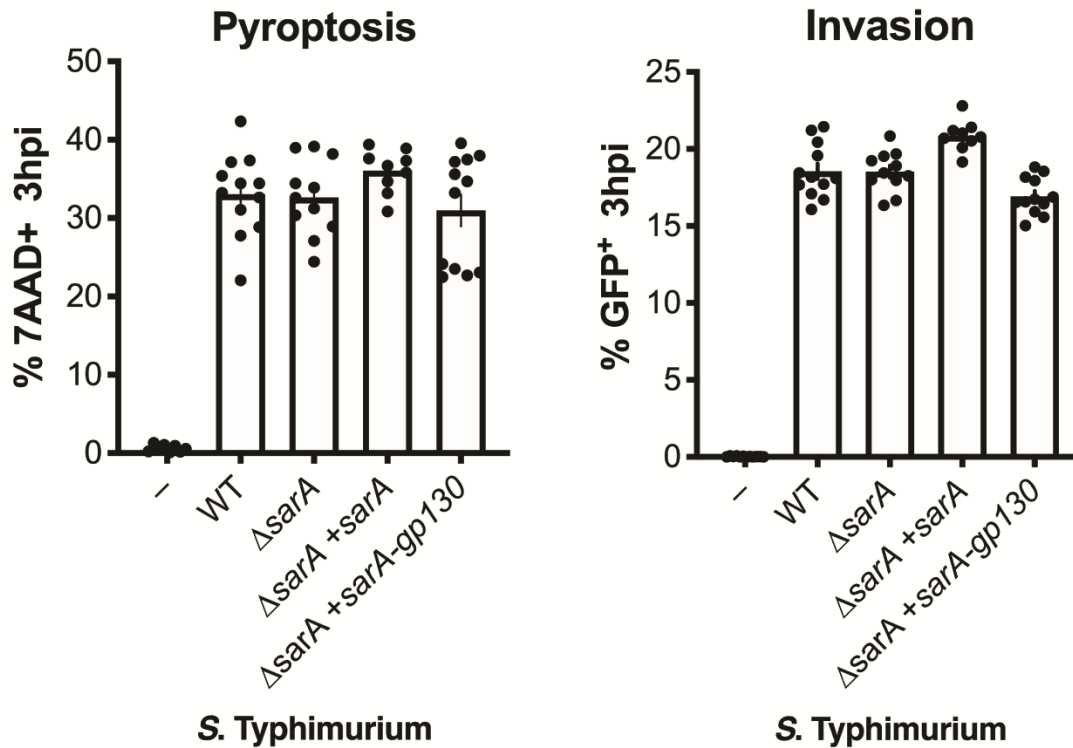

**Figure S1. Complementation with endogenous chimera does not affect *Salmonella* invasion or host cell pyroptosis, Related to Figure 1E.** Invasion and pyroptosis of GM19154 was measured 3 hpi after 70 min of IPTG treatment to induce GFP in infected cells and 5 min of 7AAD staining to mark dead cells. Percent GFP+ and 7AAD+ quantified by flow cytometry. Data from experiment in Figure 1E.

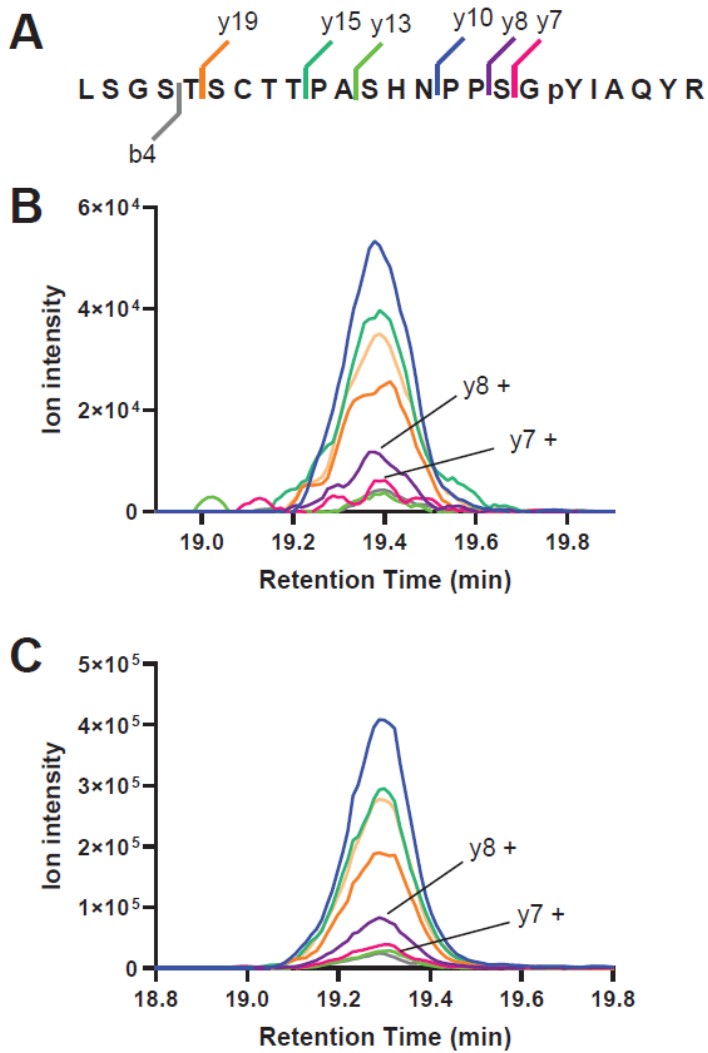

**Figure S2. Targeted quantification of pTyr167 peptide by parallel reaction monitoring, Related to Figure 2C.** (A) The endogenous pTyr167 peptide was identified on the basis of the labeled y- and b-ions, which are as follows: y10+, 1231.5507 m/z; y8+, 1037.4452 m/z; y7+, 950.4132 m/z; y19++, 1093.9699 m/z; y15++, 869.3909 m/z; y13++, 785.3459 m/z; y10++, 616.2790 m/z; b4+, 345.1769 m/z. B-C) Ion chromatograms of endogenous (light) pTyr167 peptide enriched from HeLa cells infected with (B) WT Salmonella or (C) SarA-overexpressing Salmonella. Ions are labeled as in (A). Phosphosite-localizing ions (y7 and y8) are labeled.

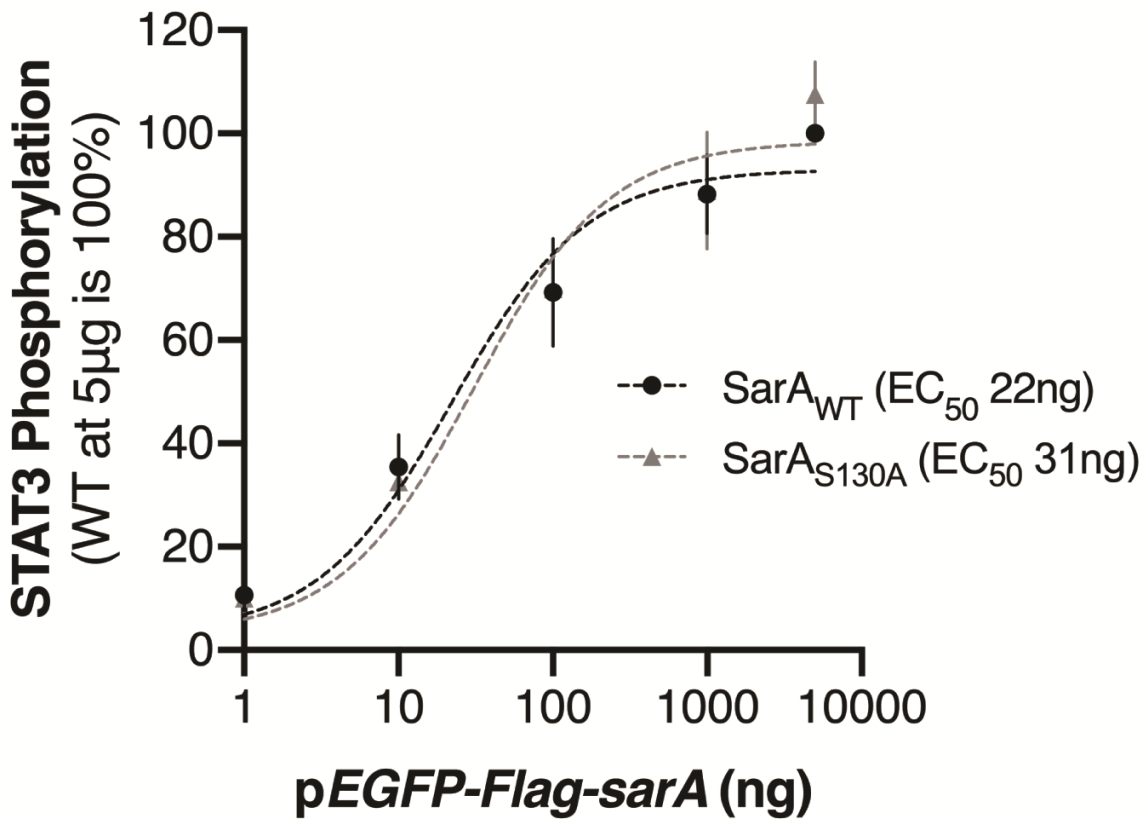

**Figure S3. Overexpression of SarA S130A induces STAT3 phosphorylation with similar efficiency as wild-type SarA, Related to Figure 4M.** HeLa cells transfected with increasing *pEGFP-Flag-sarA* (1ng to 5 µg) 24h before lysis and immunoblotting. Dots are means from four experiments with bars showing SEM. Wild-type SarA had an EC<sub>50</sub> of 22ng 95% CI [10,50] while the S130A mutation had a similar EC<sub>50</sub> of 30ng 95% CI [13,71].

| <b>Salmonella enterica Typhimurium (ATCC 14028s) Strains</b> |                                                          |                                                   |                   |                     |                                                                                           |
|--------------------------------------------------------------|----------------------------------------------------------|---------------------------------------------------|-------------------|---------------------|-------------------------------------------------------------------------------------------|
| <b>Strain</b>                                                | <b>Genotype</b>                                          | <b>Plasmid</b>                                    | <b>Resistance</b> | <b>Derived from</b> | <b>Notes</b>                                                                              |
| DCK22                                                        | 14028s                                                   | p67GFP                                            | Amp               | CS093               |                                                                                           |
| DCK436                                                       | 14028s <i>stm2585</i> ::Kan <sup>R</sup>                 | –                                                 | Kan               | CS093               |                                                                                           |
| DCK440                                                       | 14028s $\Delta$ <i>stm2585</i>                           | –                                                 | –                 | DCK436              |                                                                                           |
| DCK444                                                       | 14028s $\Delta$ <i>stm2585</i>                           | p67GFP                                            | Amp               | DCK440              |                                                                                           |
| DCK483                                                       | 14028s                                                   | pWSK29                                            | Amp               | CS093               |                                                                                           |
| DCK484                                                       | 14028s                                                   | pWSK129                                           | Kan               | CS093               |                                                                                           |
| DCK486                                                       | 14028s $\Delta$ <i>stm2585</i>                           | pWSK129                                           | Kan               | DCK440              |                                                                                           |
| DCK487a                                                      | 14028s $\Delta$ <i>stm2585</i>                           | pWSK129- <i>stm2585</i>                           | Kan               | DCK440              | <i>stm2585</i> in plasmid is flanked by 786bp on 5' and 28bp on 3' from endogenous locus. |
| DCK487b                                                      | 14028s $\Delta$ <i>stm2585</i>                           | pWSK129- <i>stm2585</i> , p67GFP                  | Amp, Kan          | DCK444              |                                                                                           |
| DCK499                                                       | 14028s $\Delta$ <i>stm2585</i> -Kan <sup>R</sup> -3xFlag | –                                                 | Kan               | CS093               |                                                                                           |
| DCK698                                                       | 14028s $\Delta$ <i>stm2585</i>                           | pWSK129- <i>stm2585</i> <sub>S130A</sub>          | Kan               | DCK440              |                                                                                           |
| DCK700                                                       | 14028s $\Delta$ <i>stm2585</i>                           | pWSK129- <i>stm2585</i> <sub>Y167F</sub>          | Kan               | DCK440              |                                                                                           |
| DCK731                                                       | 14028s $\Delta$ <i>stm2585</i>                           | pWSK129- <i>stm2585</i> <sub>S130A</sub> , p67GFP | Amp, Kan          | DCK444              |                                                                                           |
| DCK733                                                       | 14028s $\Delta$ <i>stm2585</i>                           | pWSK129- <i>stm2585</i> <sub>Y167F</sub> , p67GFP | Amp, Kan          | DCK444              |                                                                                           |
| DCK830                                                       | 14028s $\Delta$ <i>stm2585</i>                           | pUC57- <i>stm2585-gp130</i> , p67GFP              | Amp, Kan          | DCK444              | <i>gp130</i> sequence in chimera is codon-optimized for <i>E. coli</i> expression.        |
| DCK869                                                       | 14028s $\Delta$ <i>stm2585</i>                           | pWSK129- <i>stm2585-gp130</i>                     | Kan               | DCK440              |                                                                                           |

**Table S2. Bacterial strains, Related to STAR Methods.**

| Plasmid                                        | Resistance | In <i>E. coli</i> Strain | Notes                                                                                |
|------------------------------------------------|------------|--------------------------|--------------------------------------------------------------------------------------|
| pEGFP-C1                                       | Kan        | DCK53                    |                                                                                      |
| pEGFP-Flag- <i>stm2585</i>                     | Kan        | DCK528                   | <i>stm2585</i> (native sequence) in pEGFP-C1 with N-terminal Flag tag                |
| pEGFP-Flag- <i>stm2585</i> <sub>Y167F</sub>    | Kan        | DCK728                   |                                                                                      |
| pEGFP-Flag- <i>stm2585</i> <sub>S130A</sub>    | Kan        | DCK736                   |                                                                                      |
| pEGFP-Flag- <i>stm2585</i> <sub>L139*</sub>    | Kan        | DCK786                   | Removes the GBS sequence from <i>stm2585</i>                                         |
| pcDNA3                                         | Amp        | DCK77                    |                                                                                      |
| pcDNA3.1-Flag- <i>stm2585</i>                  | Amp        | DCK542, DCK796           | From GenScript. <i>stm2585</i> is codon-optimized for mammalian expression           |
| pcDNA3.1-Flag- <i>stm2585</i> <sub>Y167F</sub> | Amp        | DCK798                   |                                                                                      |
| pcDNA3.1-Flag- <i>stm2585</i> <sub>L139*</sub> | Amp        | DCK799                   |                                                                                      |
| pcDNA3.1-Flag- <i>stm2585-gp130</i>            | Amp        | DCK801                   | Human gp130 sequence, not codon-optimized                                            |
| pcDNA3.1-Flag- <i>gp130dimer</i>               | Amp        | DCK824                   | Cytosolic domain of gp130 with C-C linker and Leu zipper for dimerization            |
| pcDNA3.1-Flag- <i>gp130dimer-stm2585</i>       | Amp        | DCK825                   | <i>stm2585</i> insert (140-179) is codon-optimized for mammalian expression          |
| pWSK129                                        | Kan        | DCK827                   |                                                                                      |
| pWSK129- <i>stm2585</i>                        | Kan        | DCK809                   | <i>stm2585</i> is flanked by 786bp on 5' and 28bp on 3' from endogenous locus        |
| pWSK129- <i>stm2585</i> <sub>Y167F</sub>       | Kan        | DCK629                   |                                                                                      |
| pWSK129- <i>stm2585</i> <sub>S130A</sub>       | Kan        | DCK628a                  |                                                                                      |
| pWSK129- <i>stm2585-gp130</i>                  | Kan        | DCK852                   |                                                                                      |
| pWSK29                                         | Amp        | DCK826                   |                                                                                      |
| pUC57- <i>stm2585-gp130</i>                    | Kan        | DCK828                   | From GenScript. Human gp130 insert is codon-optimized for <i>E. coli</i> expression. |

**Table S3. Plasmids, Related to STAR Methods.**

| Designation | Name                                | Purpose                                 | Sequence                                         |
|-------------|-------------------------------------|-----------------------------------------|--------------------------------------------------|
| DK395       | <i>stm2585_T388G_Fwd</i>            | S130A in native <i>sarA</i>             | 5'-actaaagagtctttatcattaccagttGccccggatgcttta-3' |
| DK396       | <i>stm2585_T388G_Rvr</i>            | S130A in native <i>sarA</i>             | 5'-taaagcatccggggCaactggtaatgataaagactctttagt-3' |
| DK399       | <i>stm2585_A500T_Fwd</i>            | Y167F in native <i>sarA</i>             | 5'-aaccaccgtccggtttTtatcgctcaatacagg-3'          |
| DK400       | <i>stm2585_A500T_Rvr</i>            | Y167F in native <i>sarA</i>             | 5'-cctgtattgagcgataAaaccggacggtgggtt-3'          |
| DK580       | <i>EGFP-Flag-stm2585_139*_Fwd</i>   | Remove GBS from native <i>sarA</i>      | 5'-ccggatgctttaaccacaaaactattataagtgcacggtacc-3' |
| DK581       | <i>EGFP-Flag-stm2585_139*_Rvr</i>   | Remove GBS from native <i>sarA</i>      | 5'-ggtaccgtcgacttataatagttttgggttaaagcatccgg-3'  |
| DK587       | <i>EGFP-Flag-stm2585_Δ1-100_Fwd</i> | N-term truncation of native <i>sarA</i> | 5'-gacgatgacgacaagctcgagtaccagccc-3'             |
| DK588       | <i>EGFP-Flag-stm2585_Δ1-100_Fwd</i> | N-term truncation of native <i>sarA</i> | 5'-gggctggactcgagcttgtcgtcatcgtc-3'              |
| DK652       | <i>Flag-stm2585-gp130_139*_Fwd</i>  | Remove gp130 from chimera               | 5'-cactgacacagaagctgctgtaagaattctgcagatatcc-3'   |
| DK653       | <i>Flag-stm2585-gp130_139*_Rvr</i>  | Remove gp130 from chimera               | 5'-ggatatctgcagaattcttacagcagcttctgtgctcagtg-3'  |
| DK670       | <i>Flag-stm2585_ΔFlag_Fwd</i>       | Untag codon-opt <i>sarA</i>             | 5'-agacaaatcgcatcatggtggcggatccgagc-3'           |
| DK671       | <i>Flag-stm2585_ΔFlag_Rvr</i>       | Untag codon-opt <i>sarA</i>             | 5'-gctcggatccgccaccatgatgctgatttgtct-3'          |

**Table S4. Primers, Related to STAR Methods.**
